# Supplementary figures and images for: Rev7 and 53BP1/Crb2 prevent RecQ helicase-dependent hyper-resection of DNA double-strand breaks
Source: eLife journal article supplement (doi:10.7554/elife.33402), 2018-04-26

**A**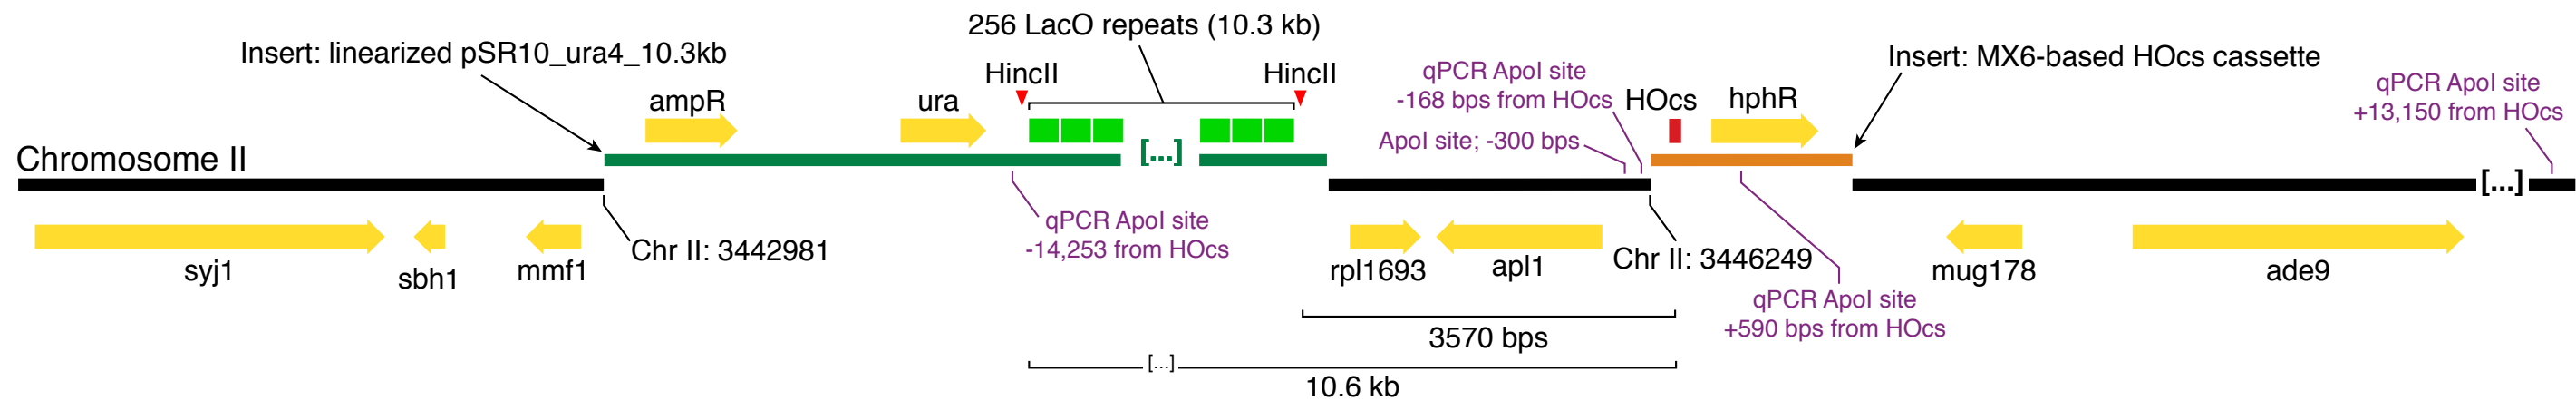**B**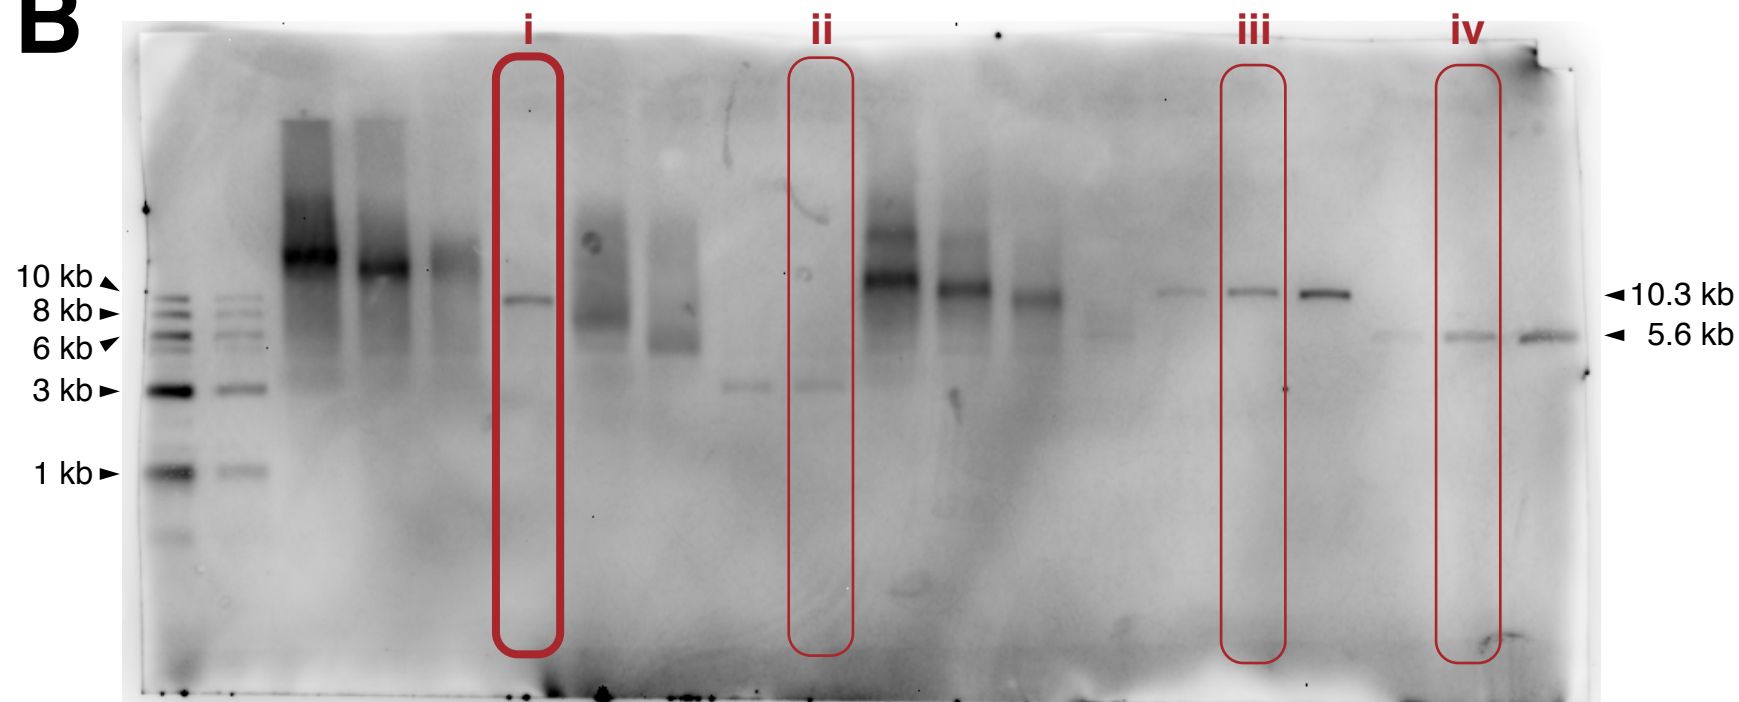

Supplement: supp [file elife_poa_e33402_Figure_1_figure_supplement_1.pdf › elife_poa_e33402_Figure_1_figure_supplement_1.pdf]

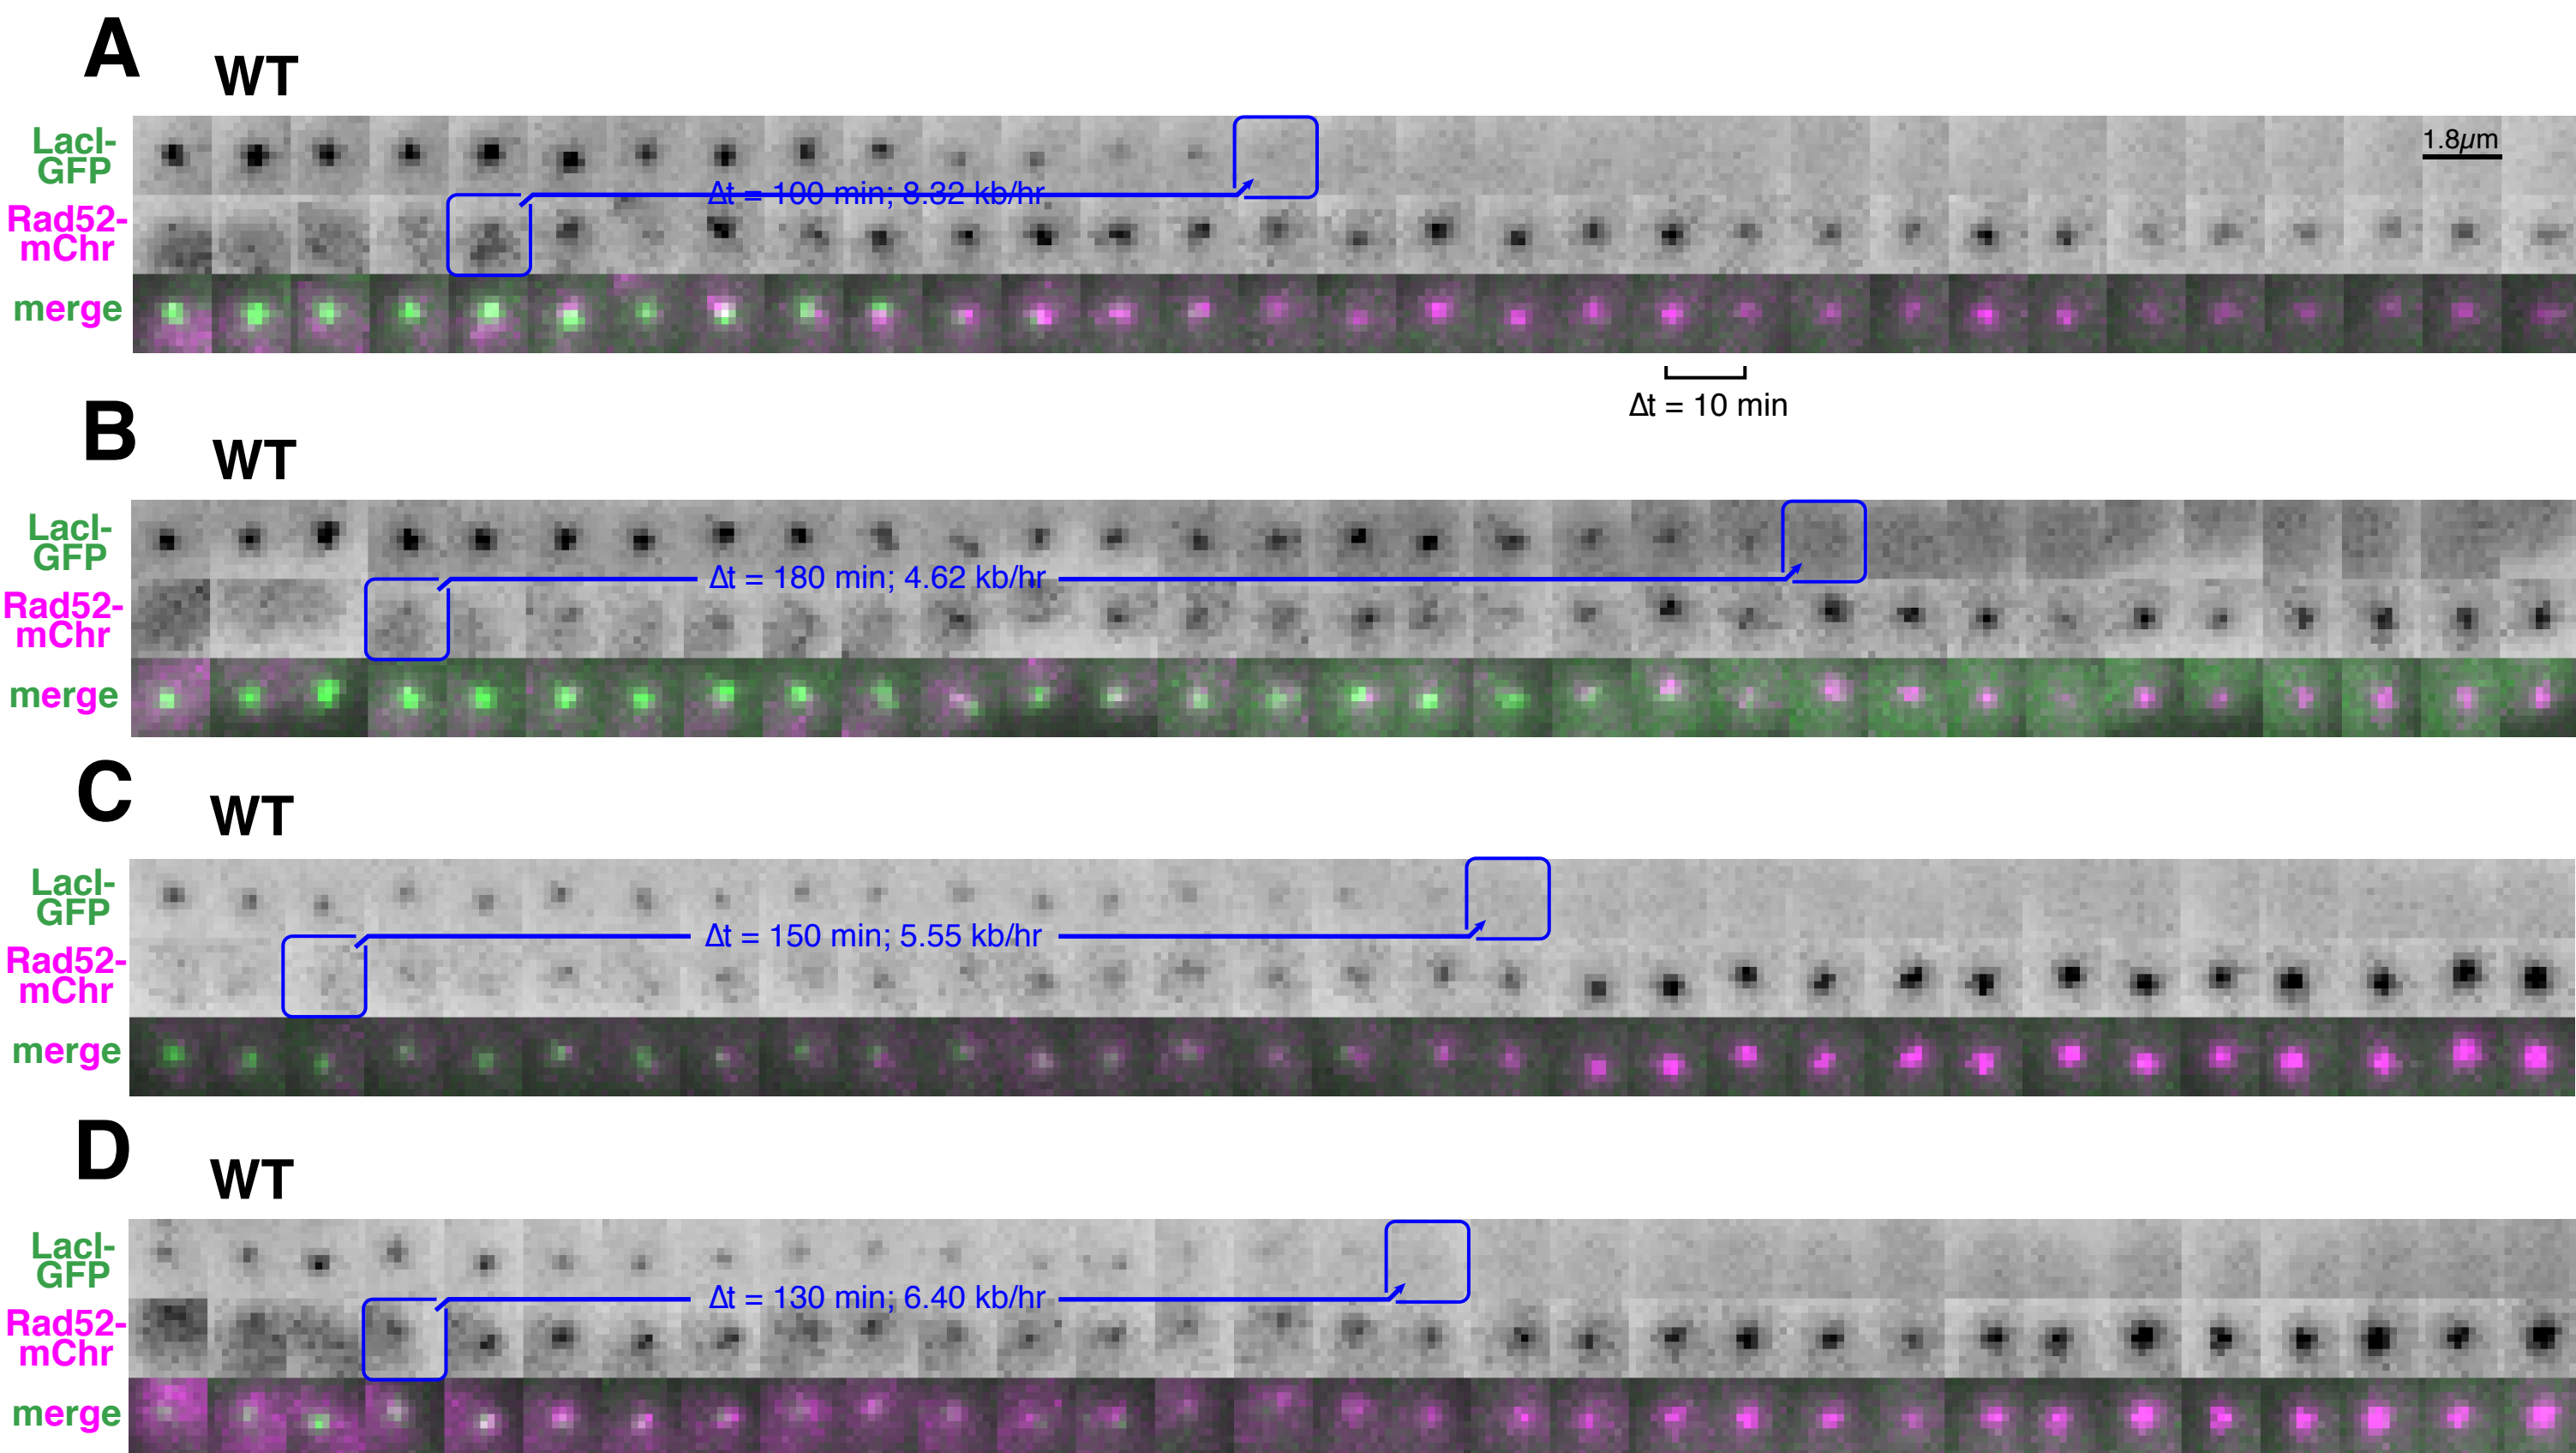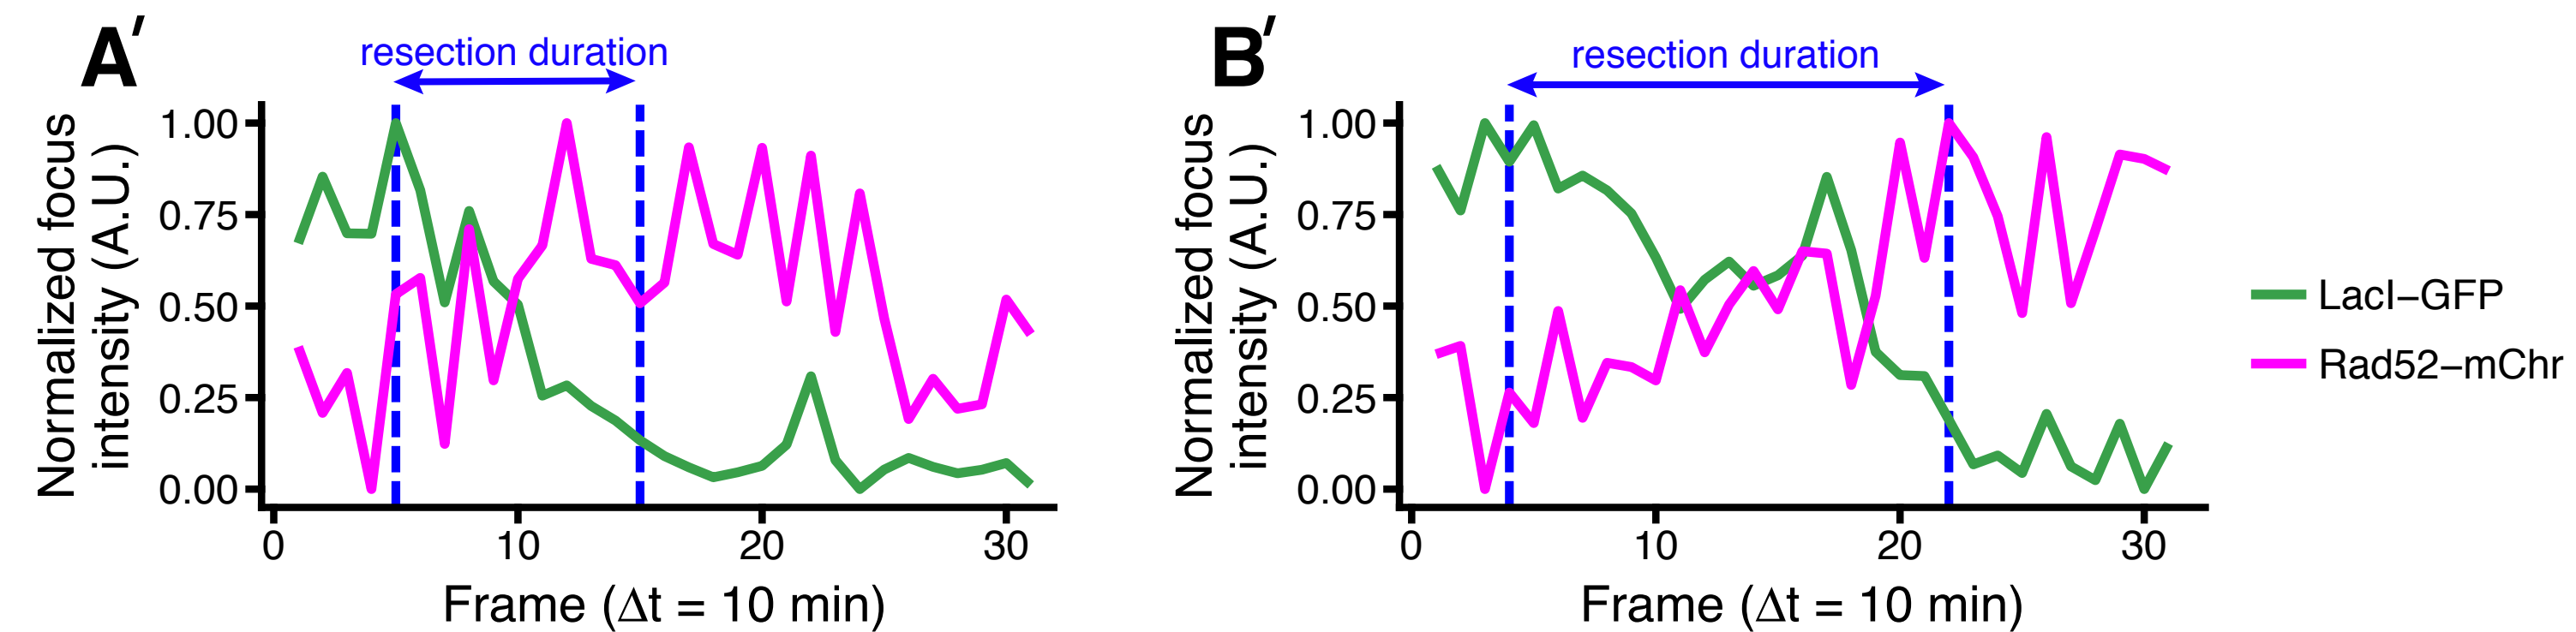

Supplement: supp [file elife_poa_e33402_Figure_1_figure_supplement_2.pdf › elife_poa_e33402_Figure_1_figure_supplement_2.pdf]

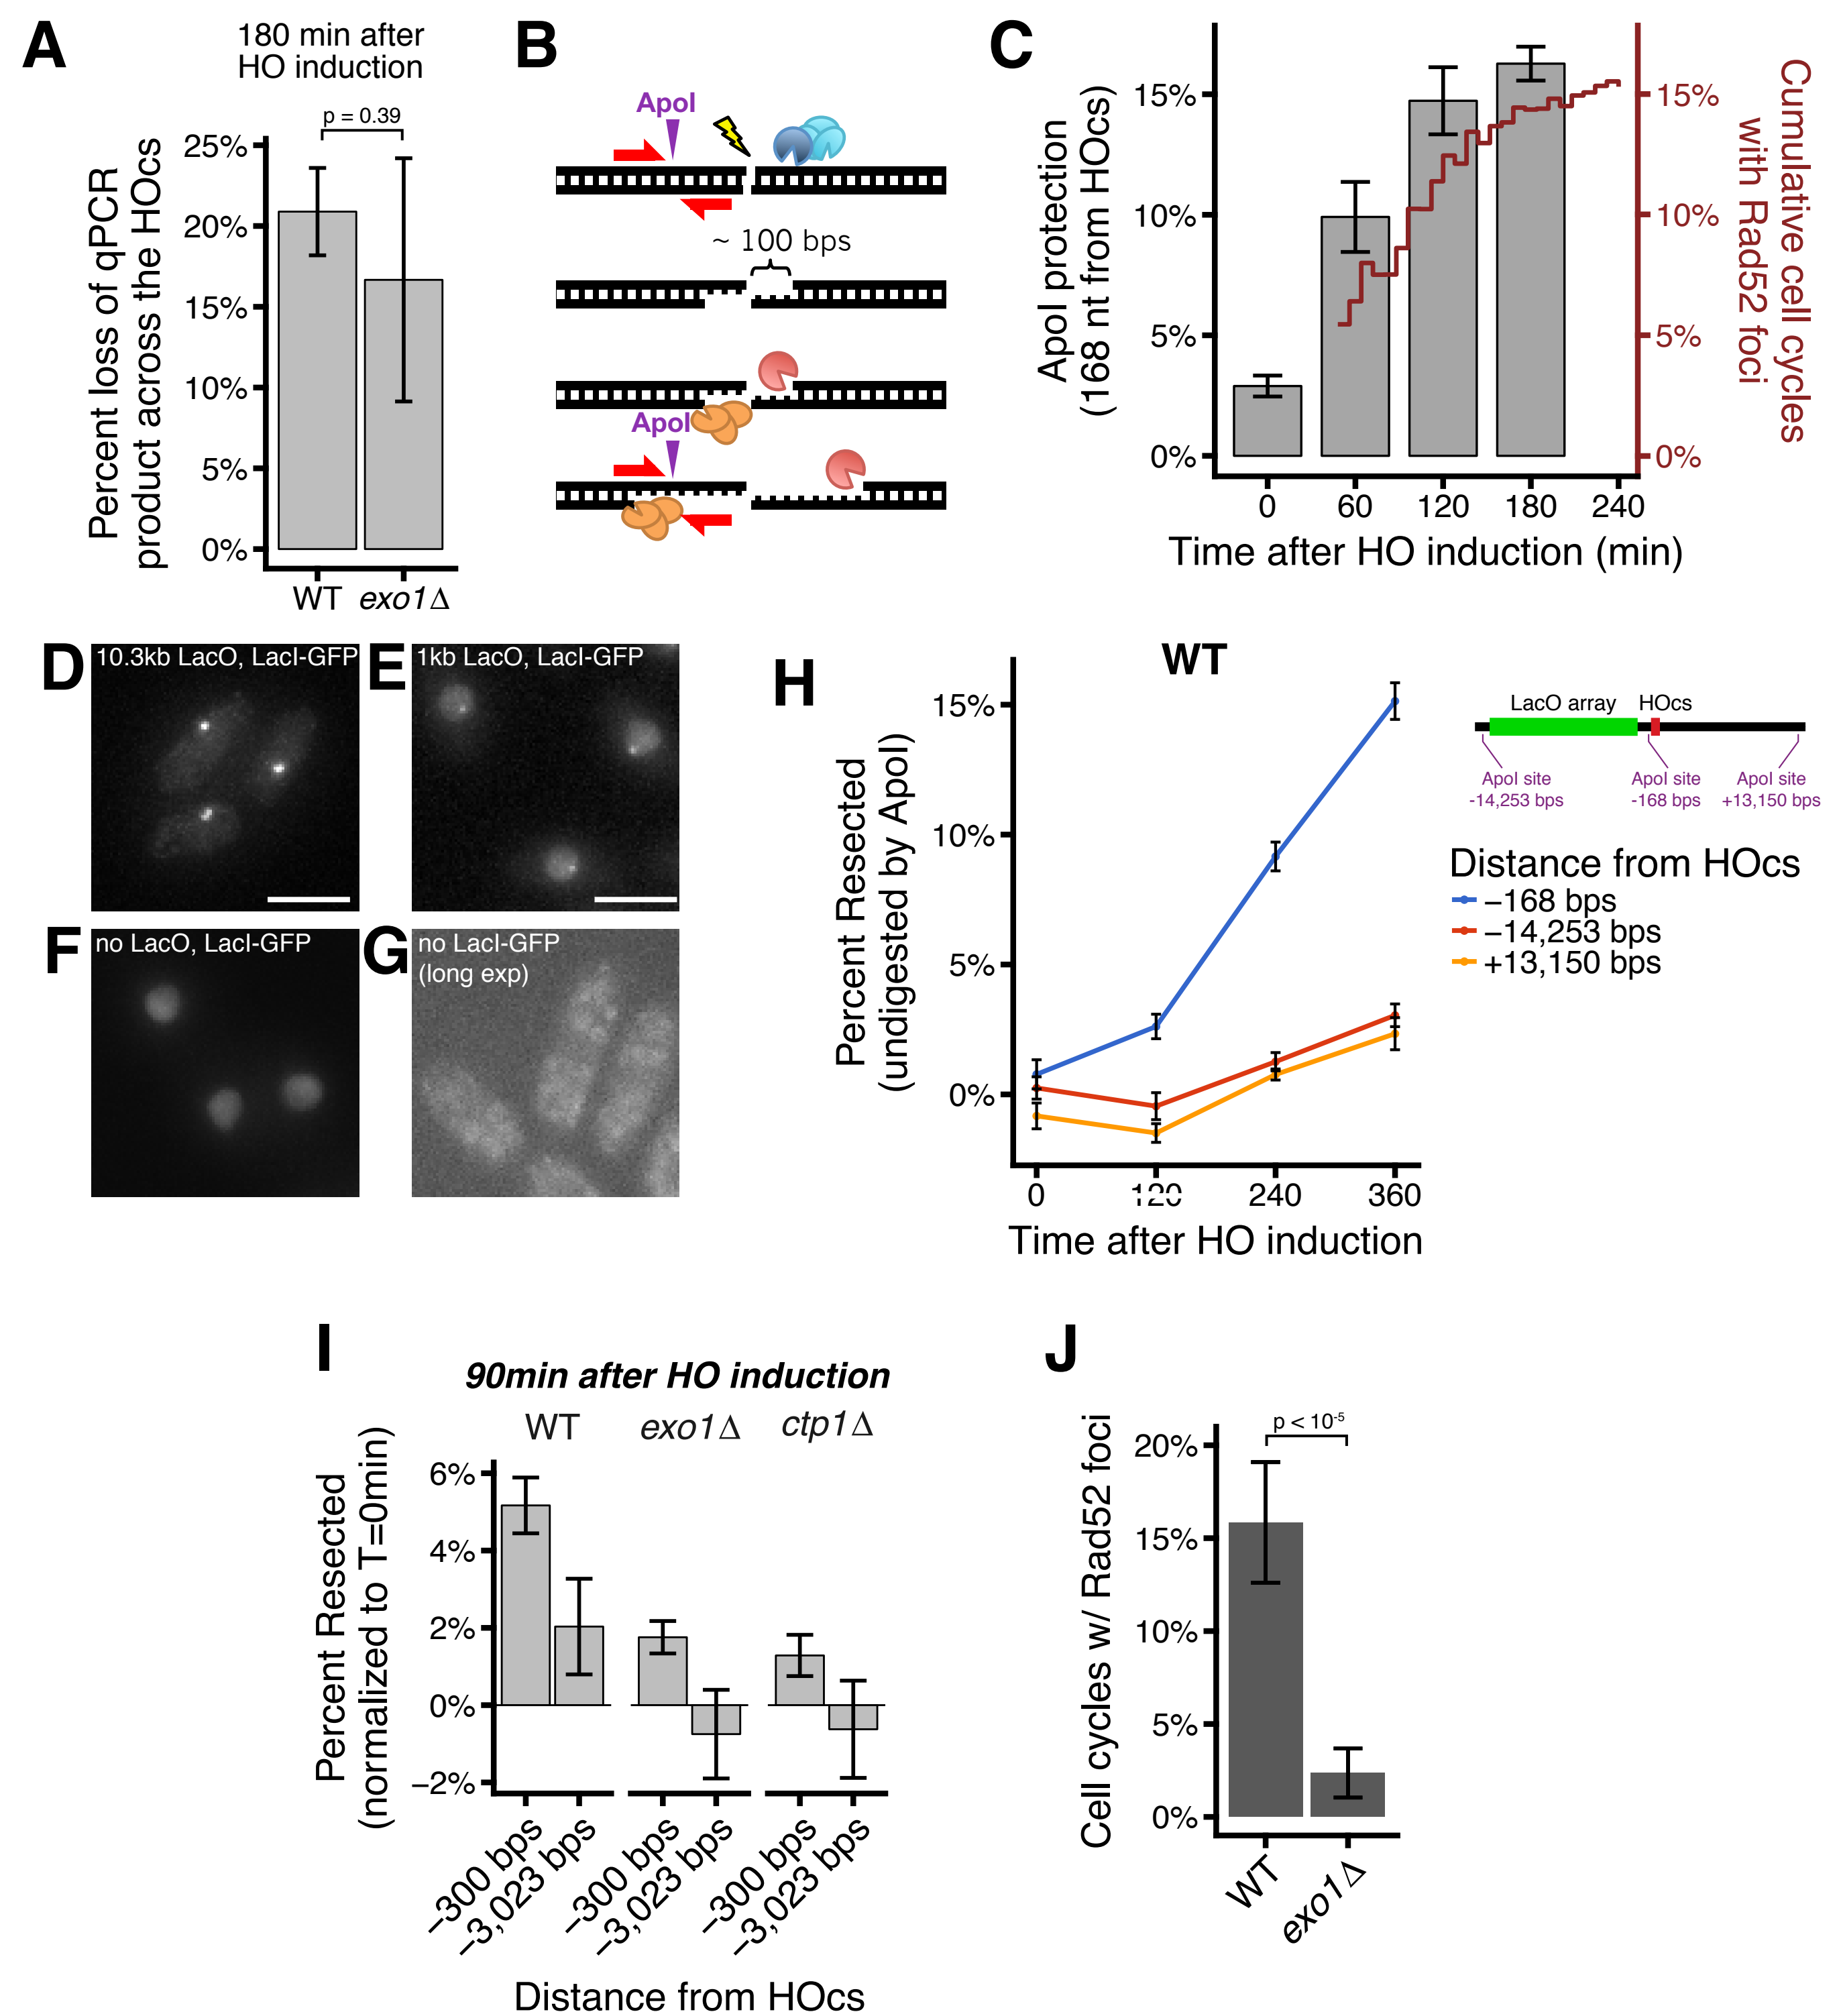

Supplement: supp [file elife_poa_e33402_Figure_1_figure_supplement_3.pdf › elife_poa_e33402_Figure_1_figure_supplement_3.pdf]

**rev7 $\Delta$** 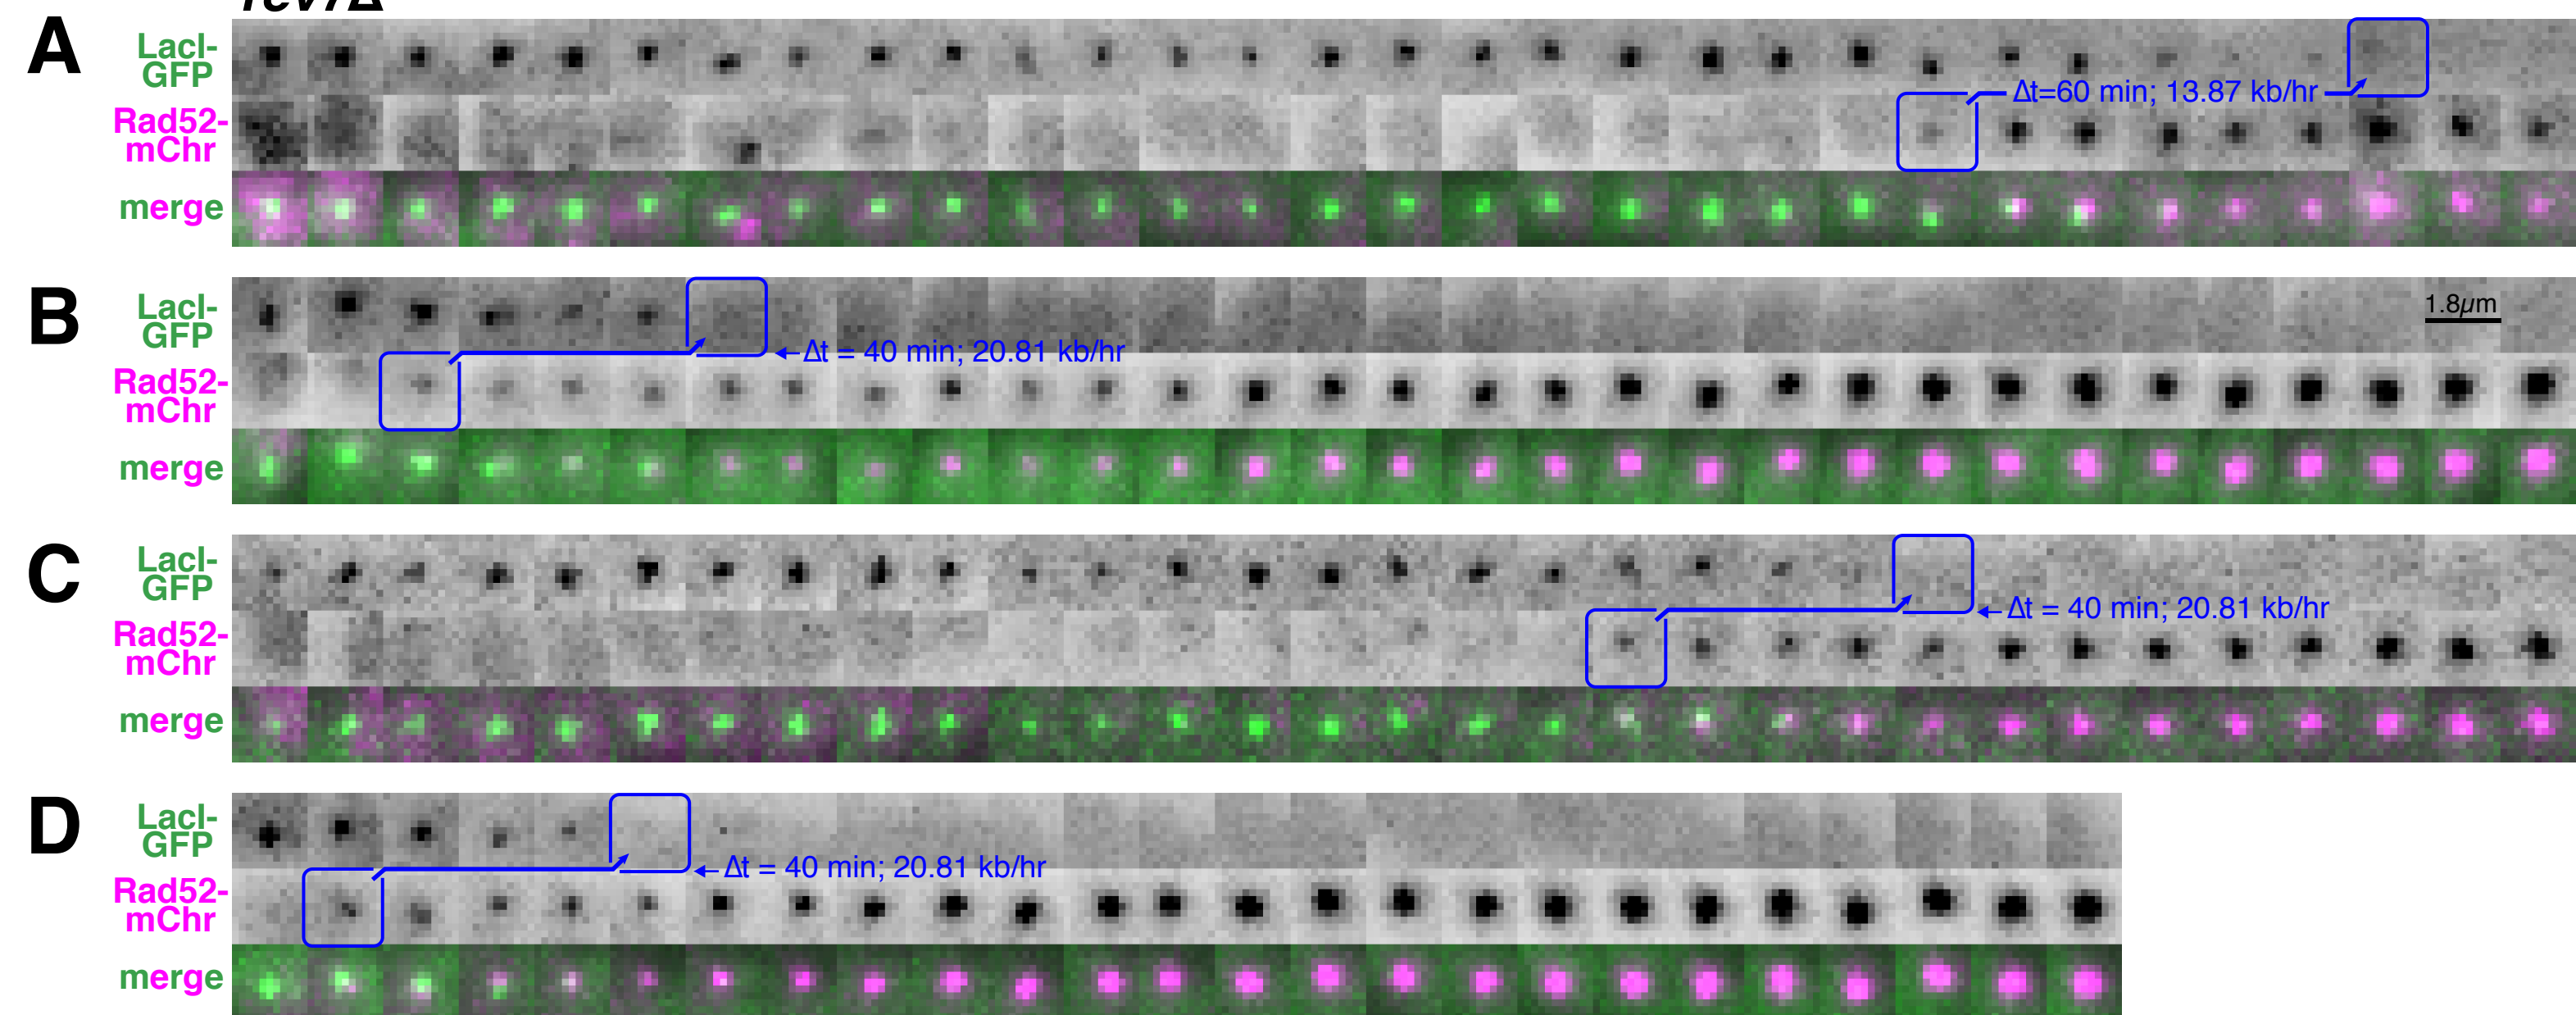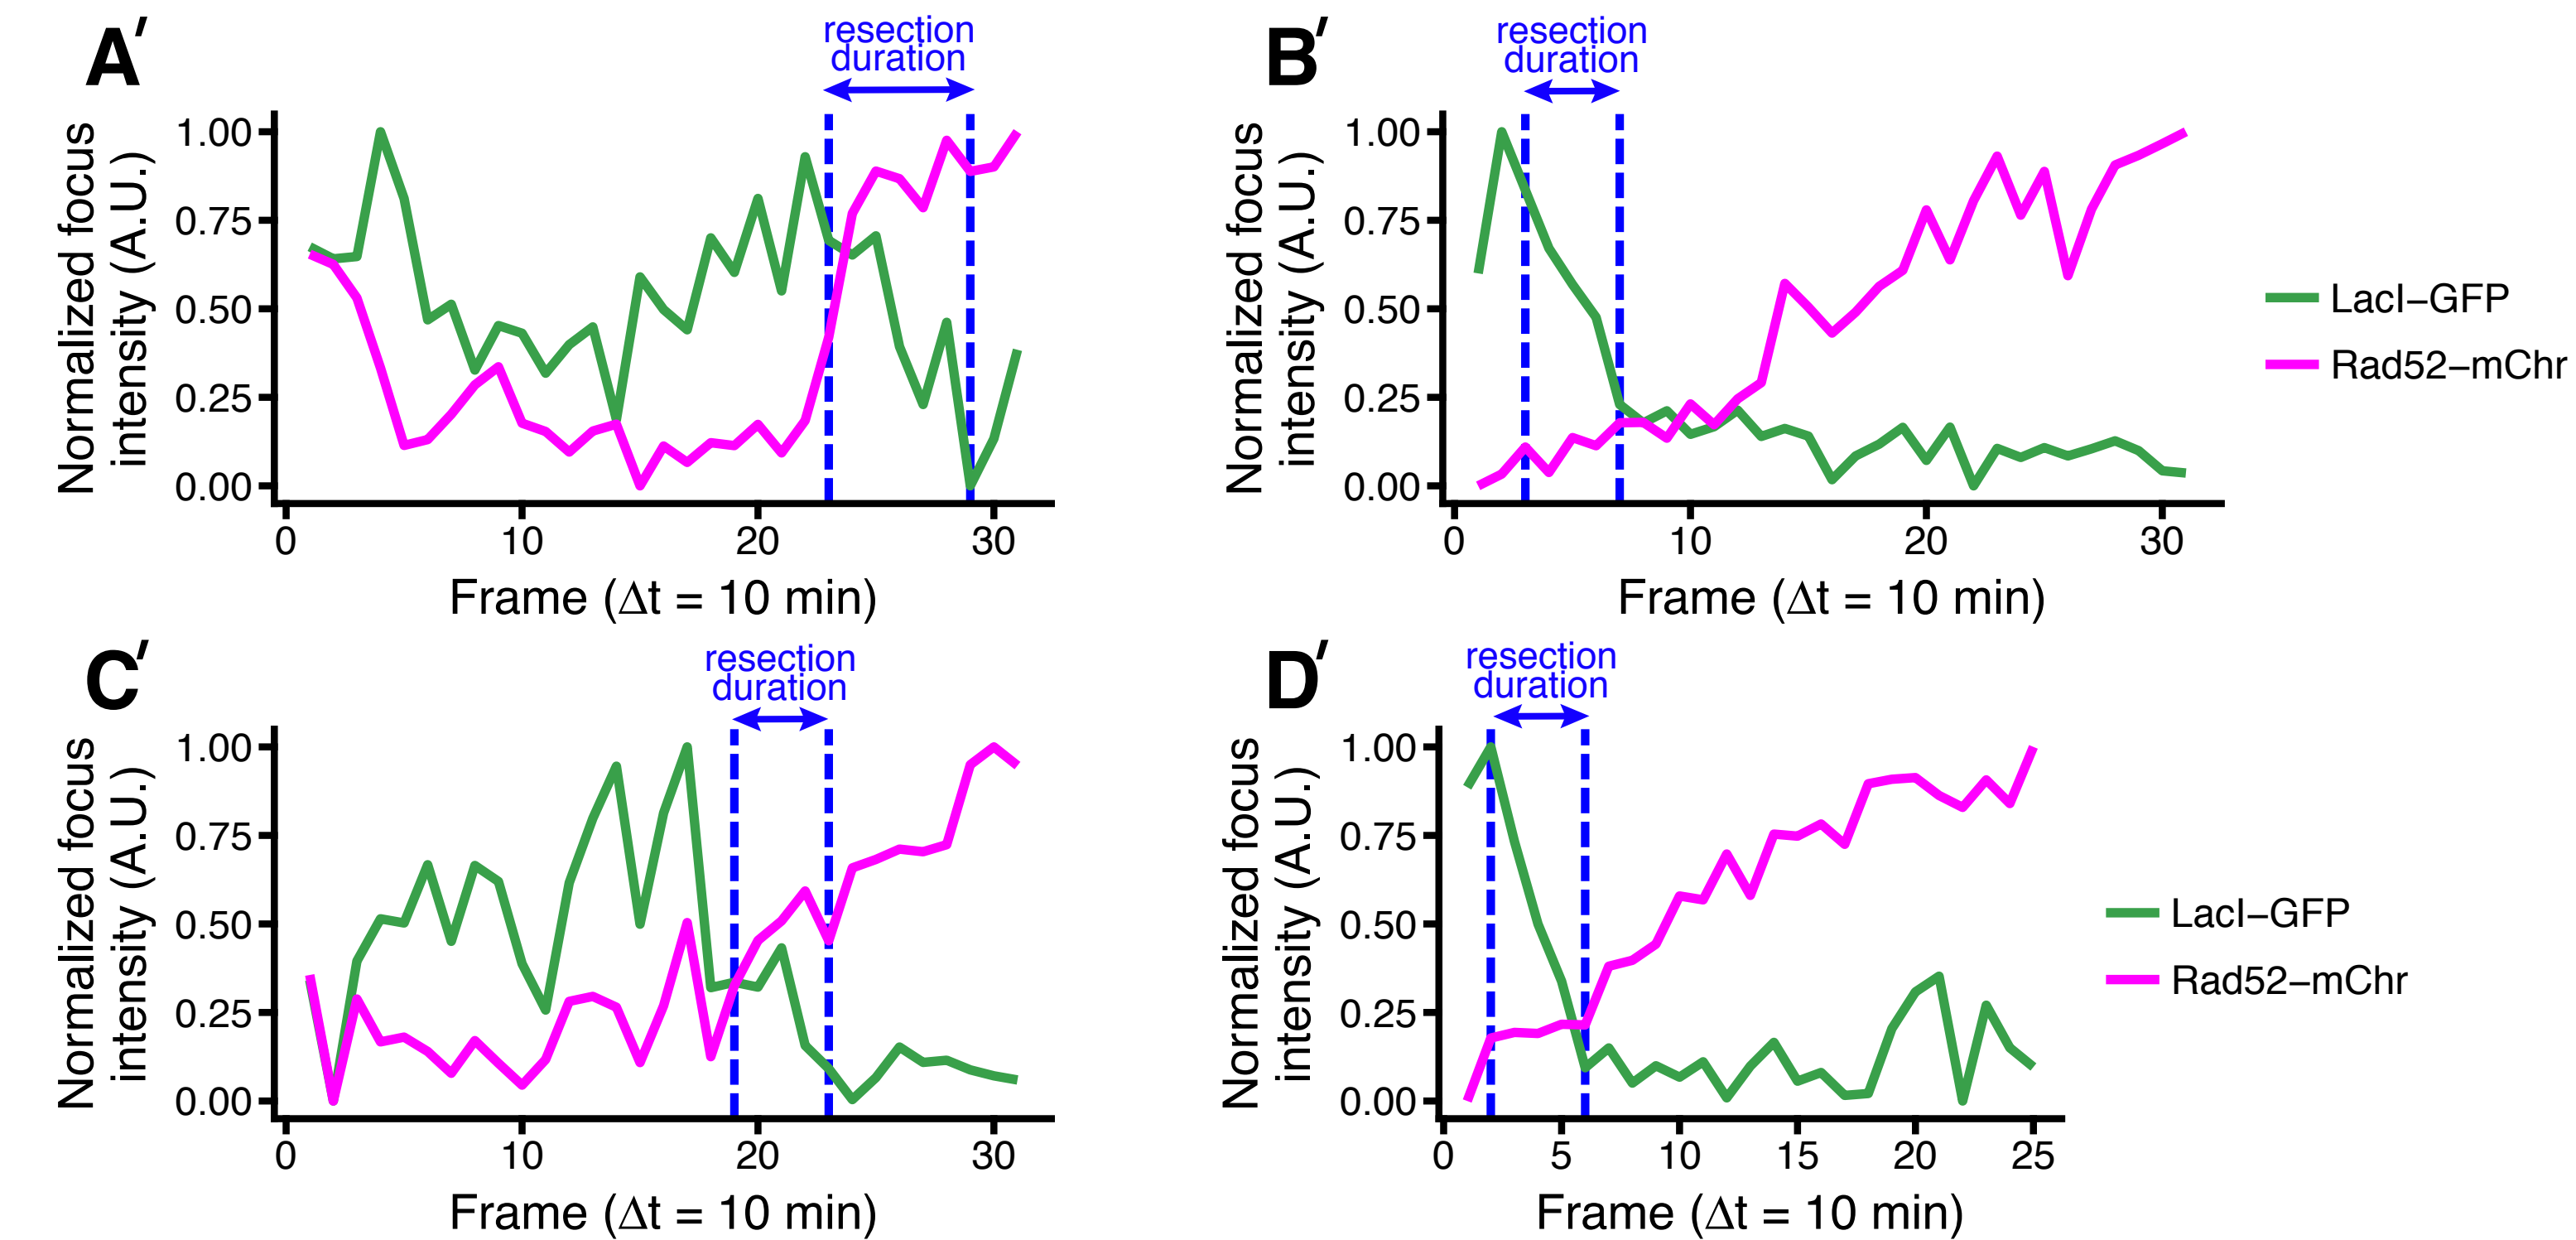

Supplement: supp [file elife_poa_e33402_Figure_2_figure_supplement_1.pdf › elife_poa_e33402_Figure_2_figure_supplement_1.pdf]

**A*****crb2Δexo1Δ***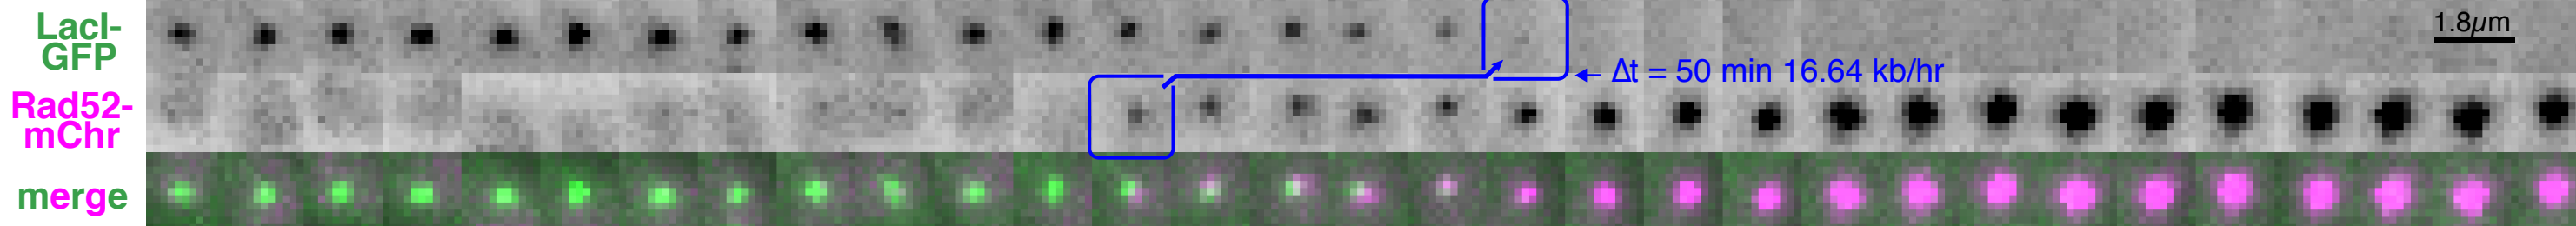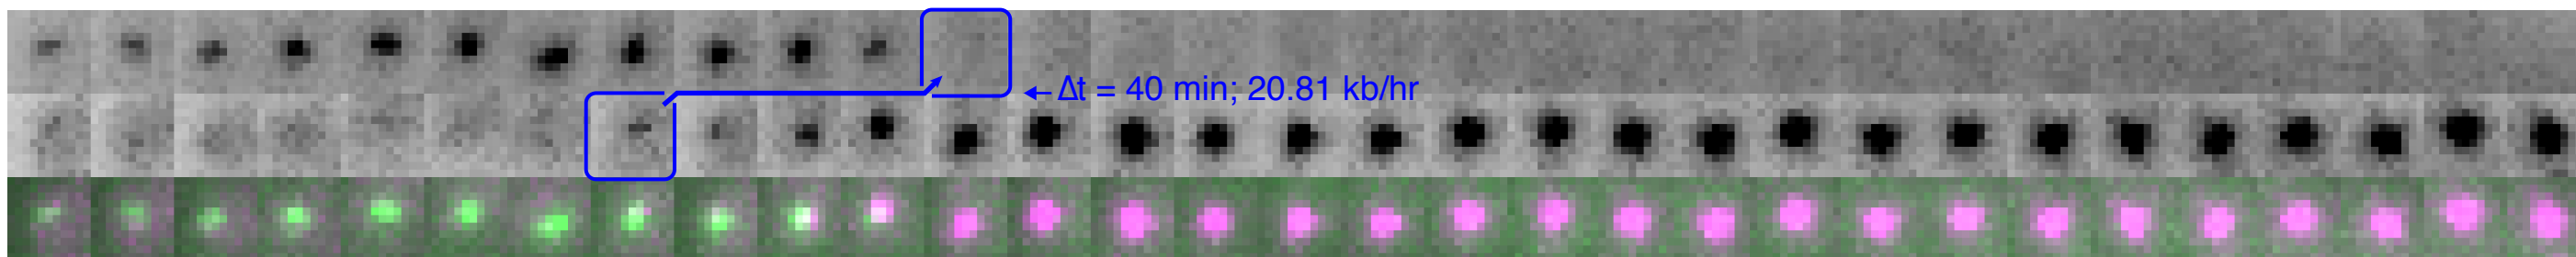

$\Delta t = 10$  min

**B*****rev7Δexo1Δ***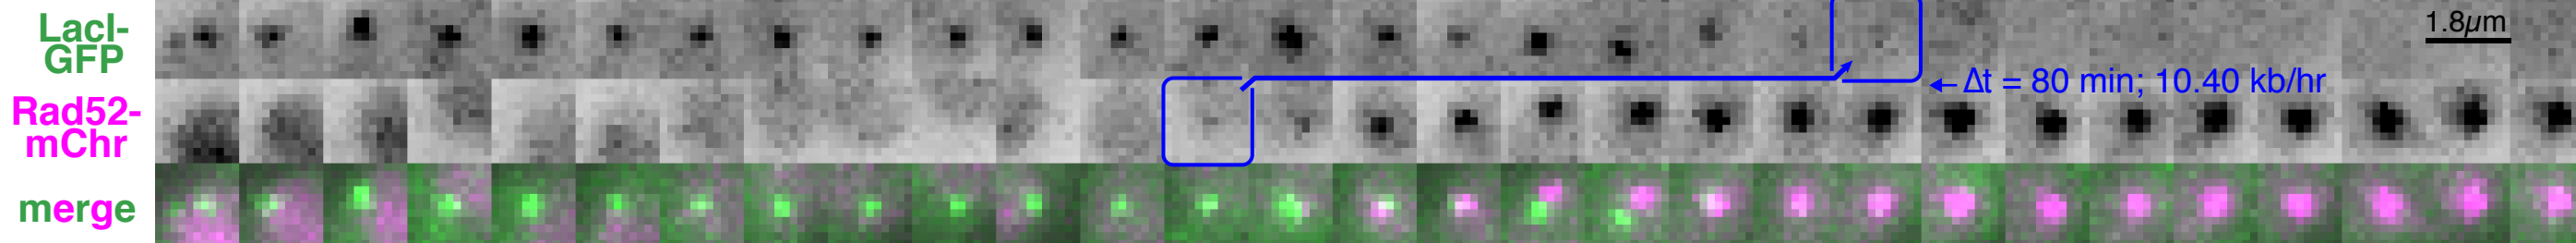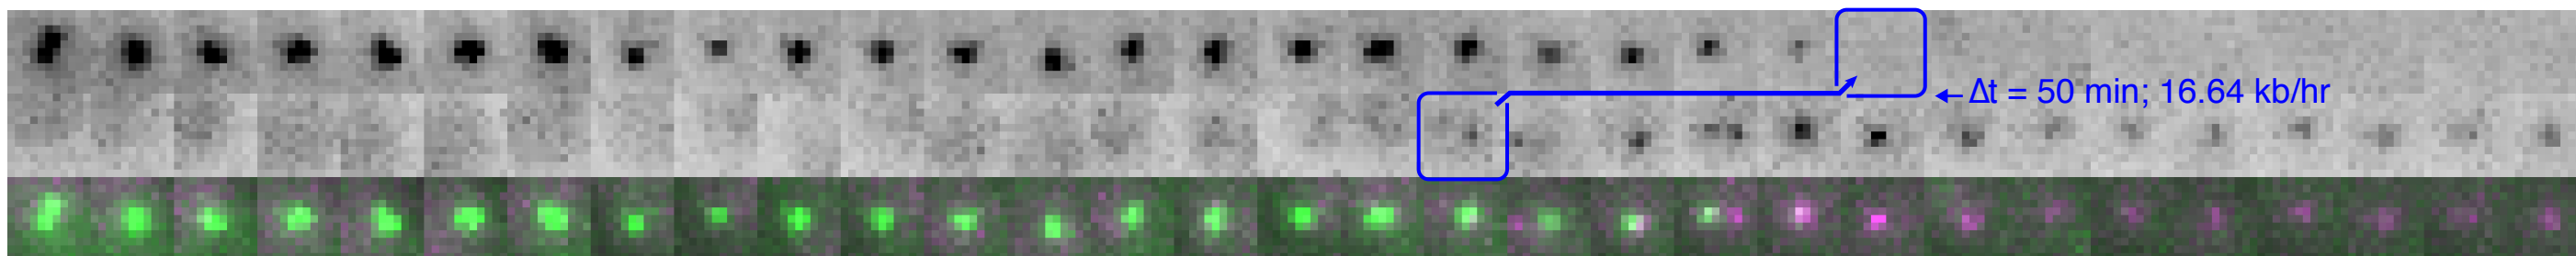

$\Delta t = 10$  min

Supplement: supp [file elife_poa_e33402_Figure_3_figure_supplement_1.pdf › elife_poa_e33402_Figure_3_figure_supplement_1.pdf]

**A**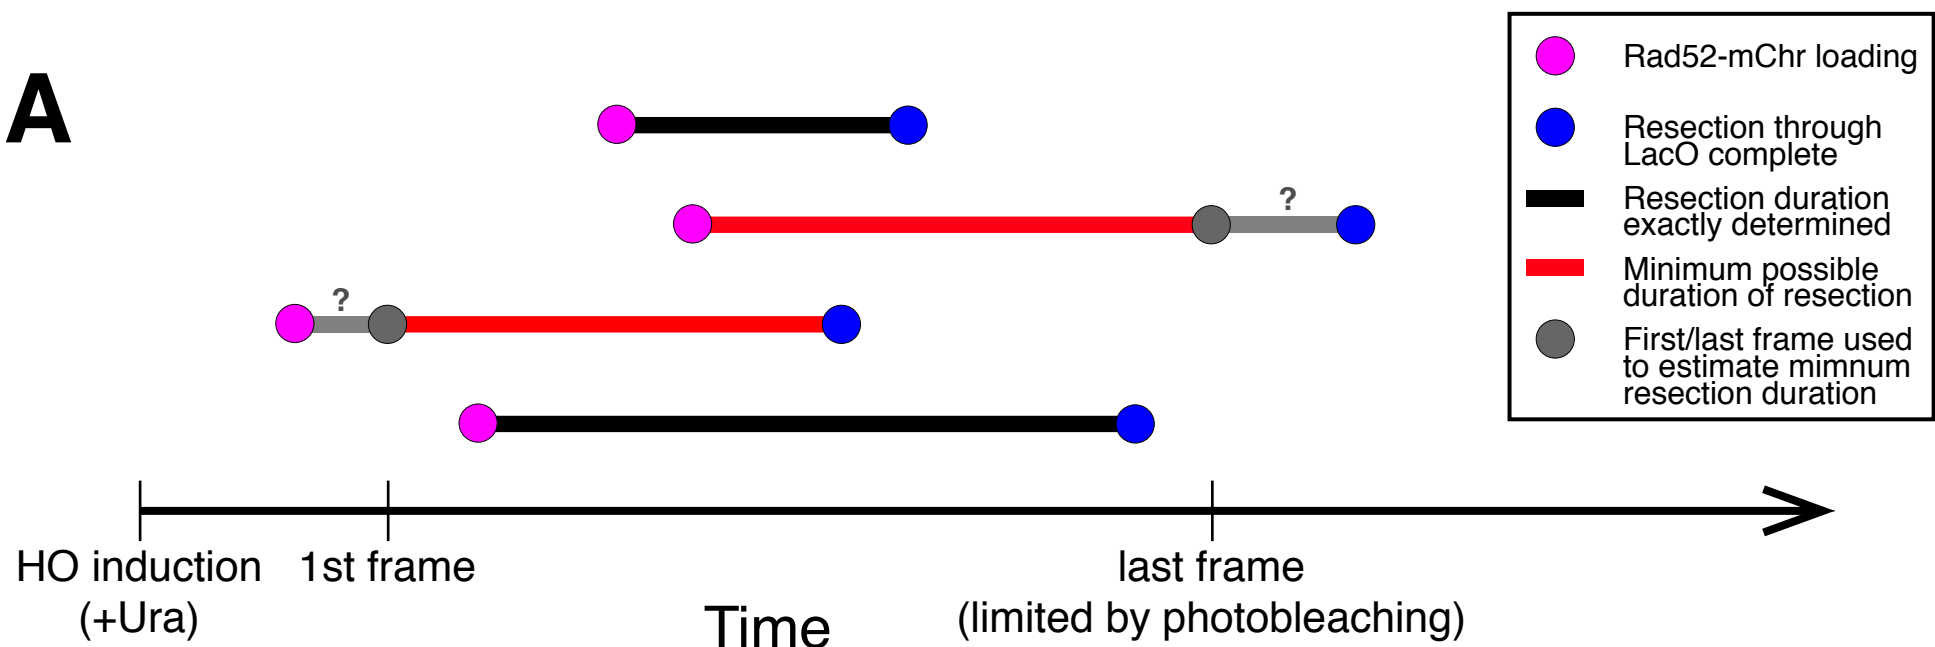**B**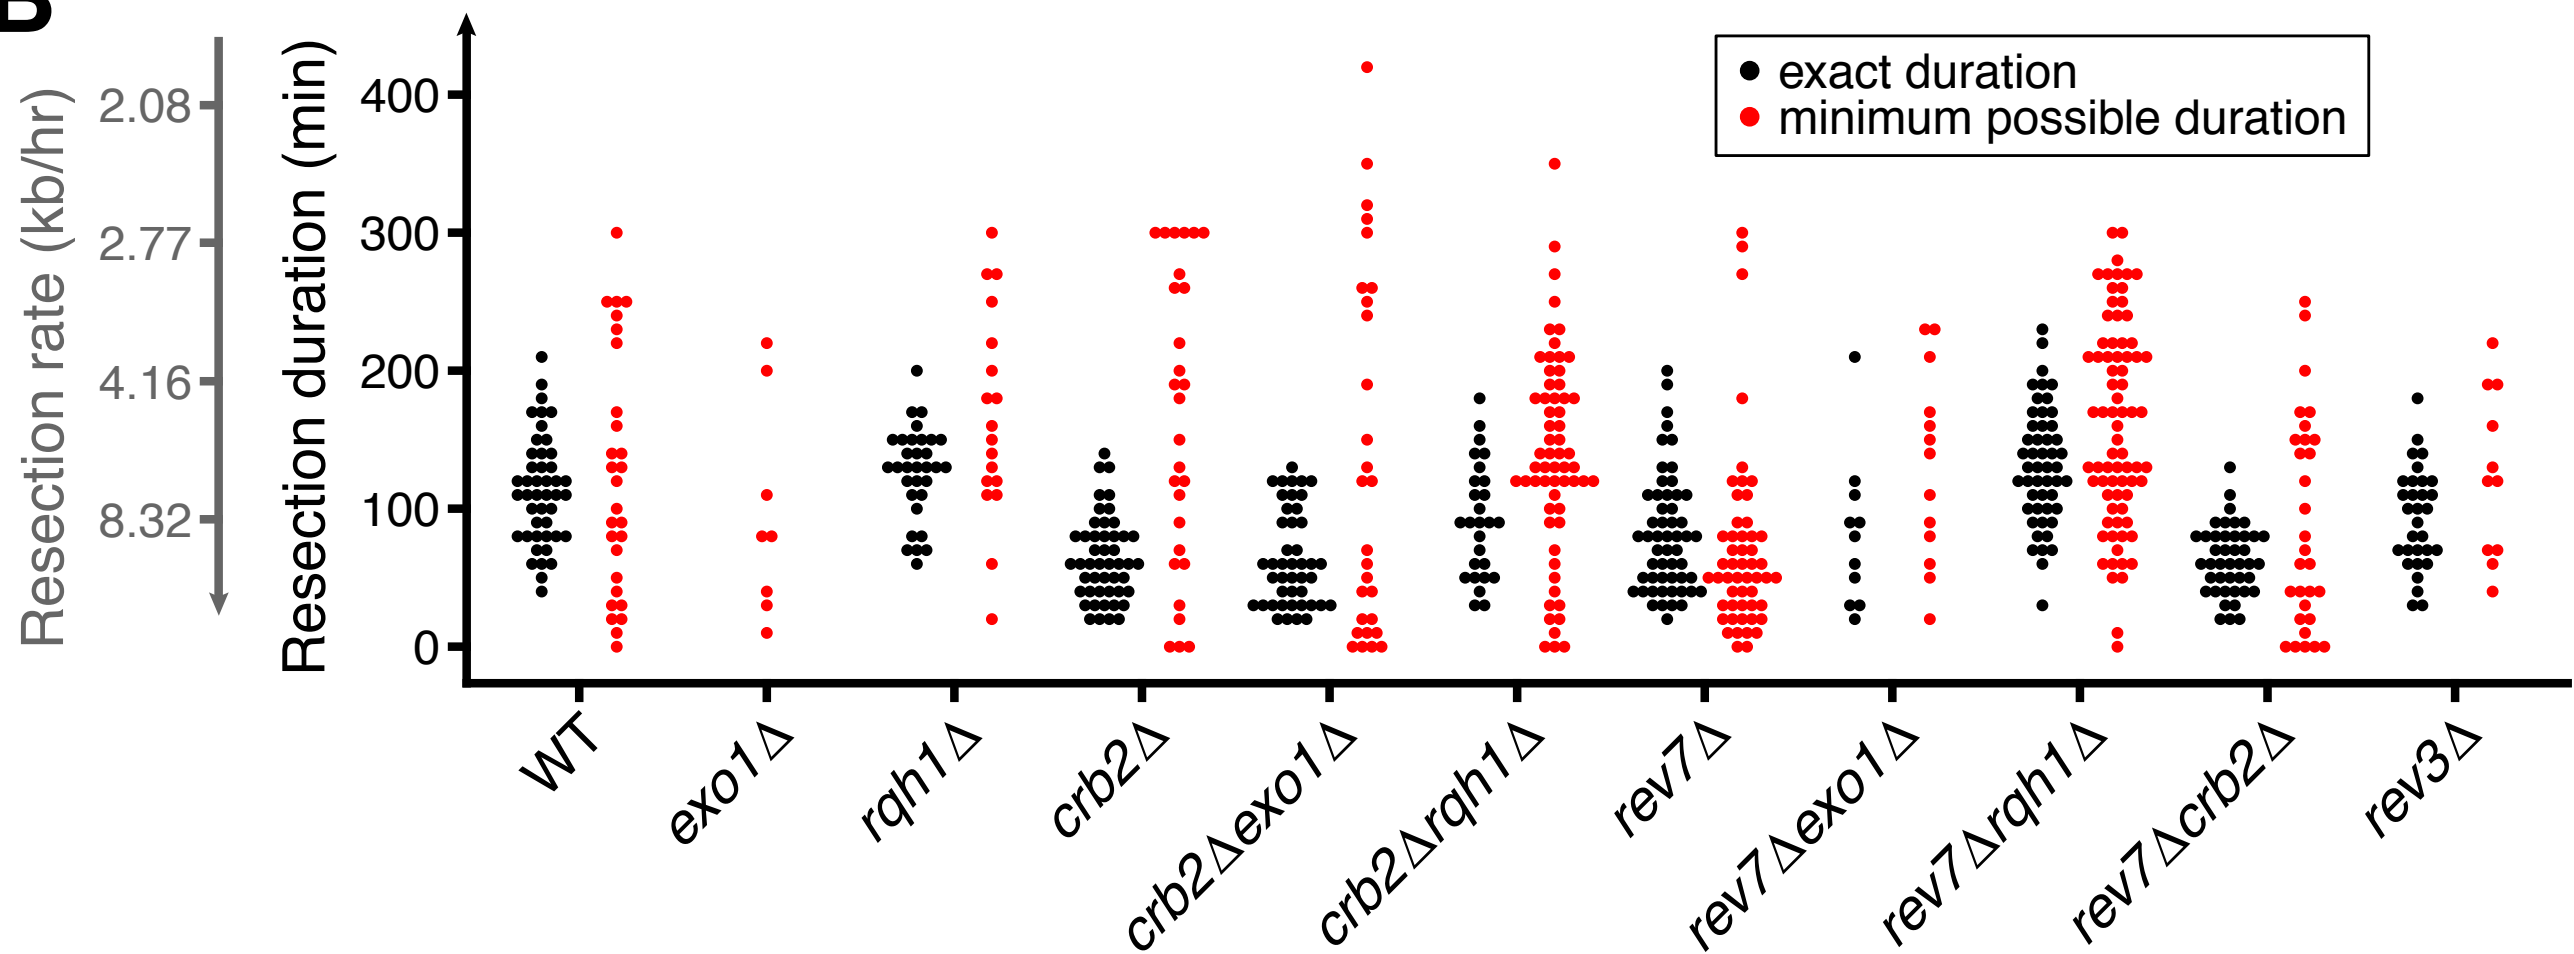

Supplement: supp [file elife_poa_e33402_Figure_3_figure_supplement_2.pdf › elife_poa_e33402_Figure_3_figure_supplement_2.pdf]
